# Supplementary material for: Altered proTGFα/cleaved TGFα ratios offer new therapeutic strategies in renal carcinoma
Source: Springer Nature journal article supplement (doi:10.1186/s13046-021-02051-0), 2021-08-16

**A**

|            |         |                |
|------------|---------|----------------|
| Patient 01 | BT-3351 | Paired         |
| Patient 02 | BT-3410 | Paired         |
| Patient 03 | BT-3436 | Paired         |
| Patient 04 | BT-3501 | Paired         |
| Patient 05 | BT-3514 | Paired         |
| Patient 06 | BT-3521 | Paired         |
| Patient 07 | BT-3536 | Paired         |
| Patient 08 | BT-3700 | Paired         |
| Patient 09 | BT-3731 | Paired         |
| Patient 10 | BT-3775 | Paired         |
| Patient 11 | BT-3776 | Paired         |
| Patient 12 | BT-3116 | Paired         |
| Patient 13 | BT-3124 | Paired         |
| Patient 14 | BT-3246 | Paired         |
| Patient 15 | BT-3261 | Paired         |
| Patient 16 | BT-3268 | Tumor only     |
| Patient 17 | BT-3115 | Paired         |
| Patient 18 | BT-3041 | Paired         |
| Patient 19 | BT-3036 | Paired         |
| Patient 20 | BT-3033 | Paired         |
| Patient 21 | BT-3056 | Tumor only     |
| Patient 22 | BT-2986 | Paired         |
| Patient 23 | BT-2999 | Healthy tissue |
| Patient 24 | BT-2957 | Tumor only     |

**B**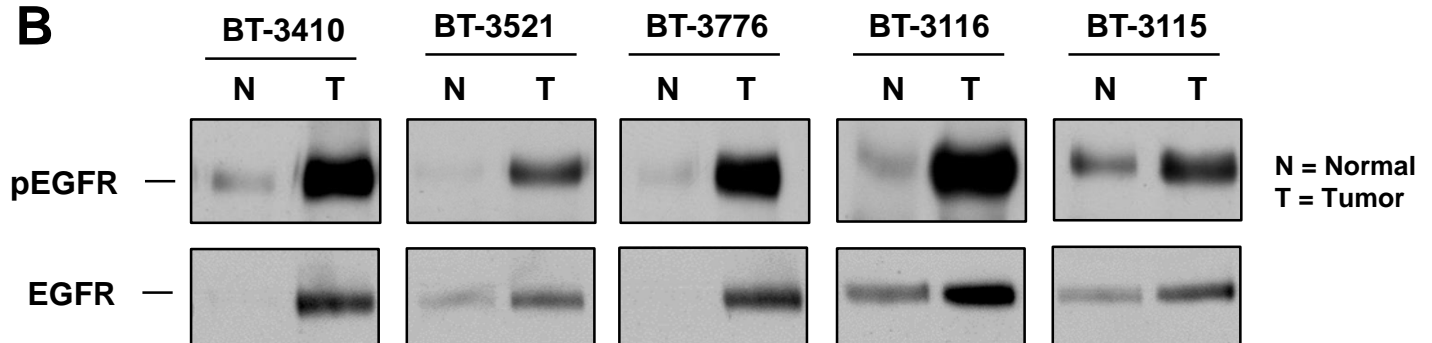

Supplement: MOESM1 [file 19574190]
