# Supplementary material for: Altered proTGFα/cleaved TGFα ratios offer new therapeutic strategies in renal carcinoma
Source: Springer Nature journal article supplement (doi:10.1186/s13046-021-02051-0), 2021-08-16

**A****EGFR**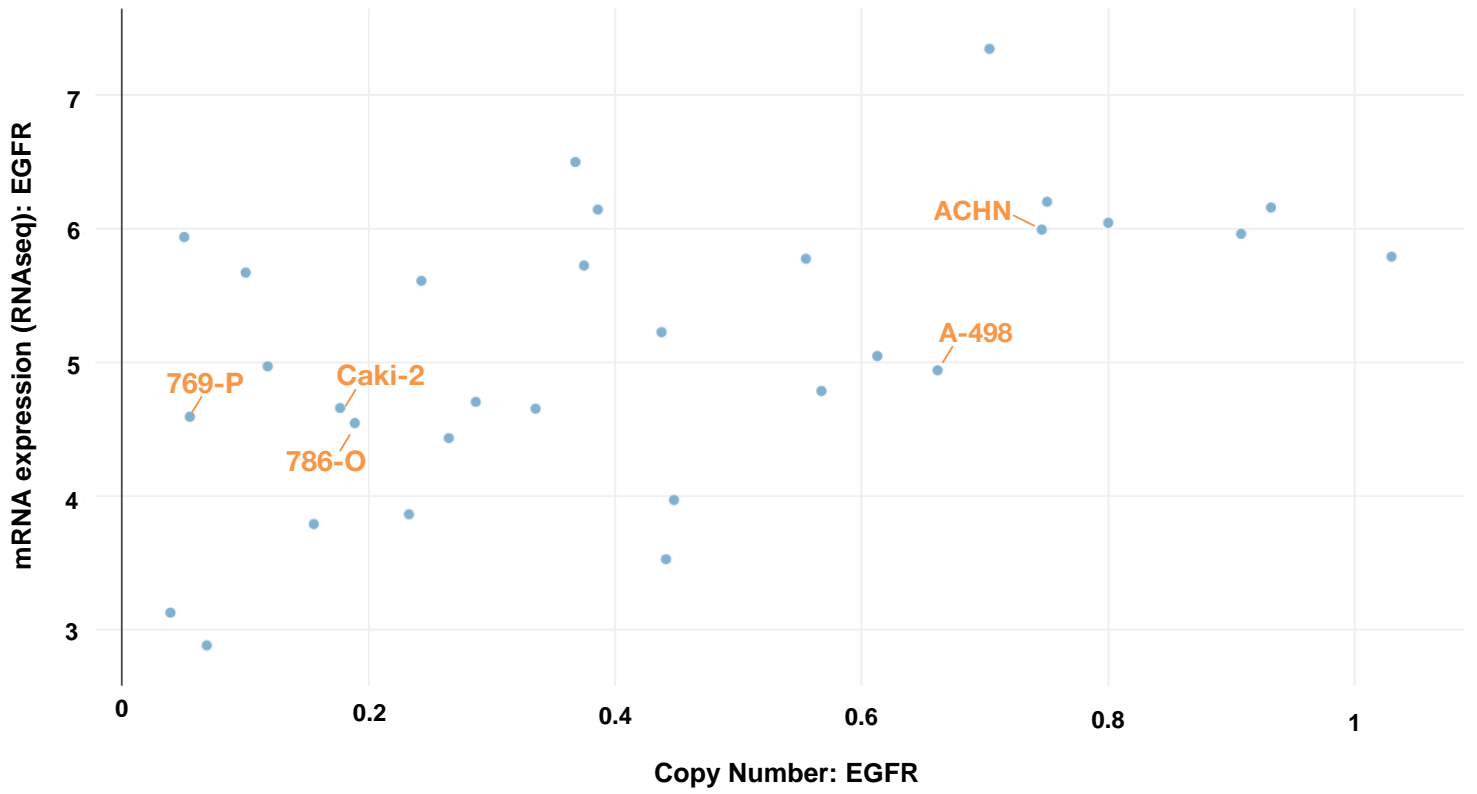**B****TGFA**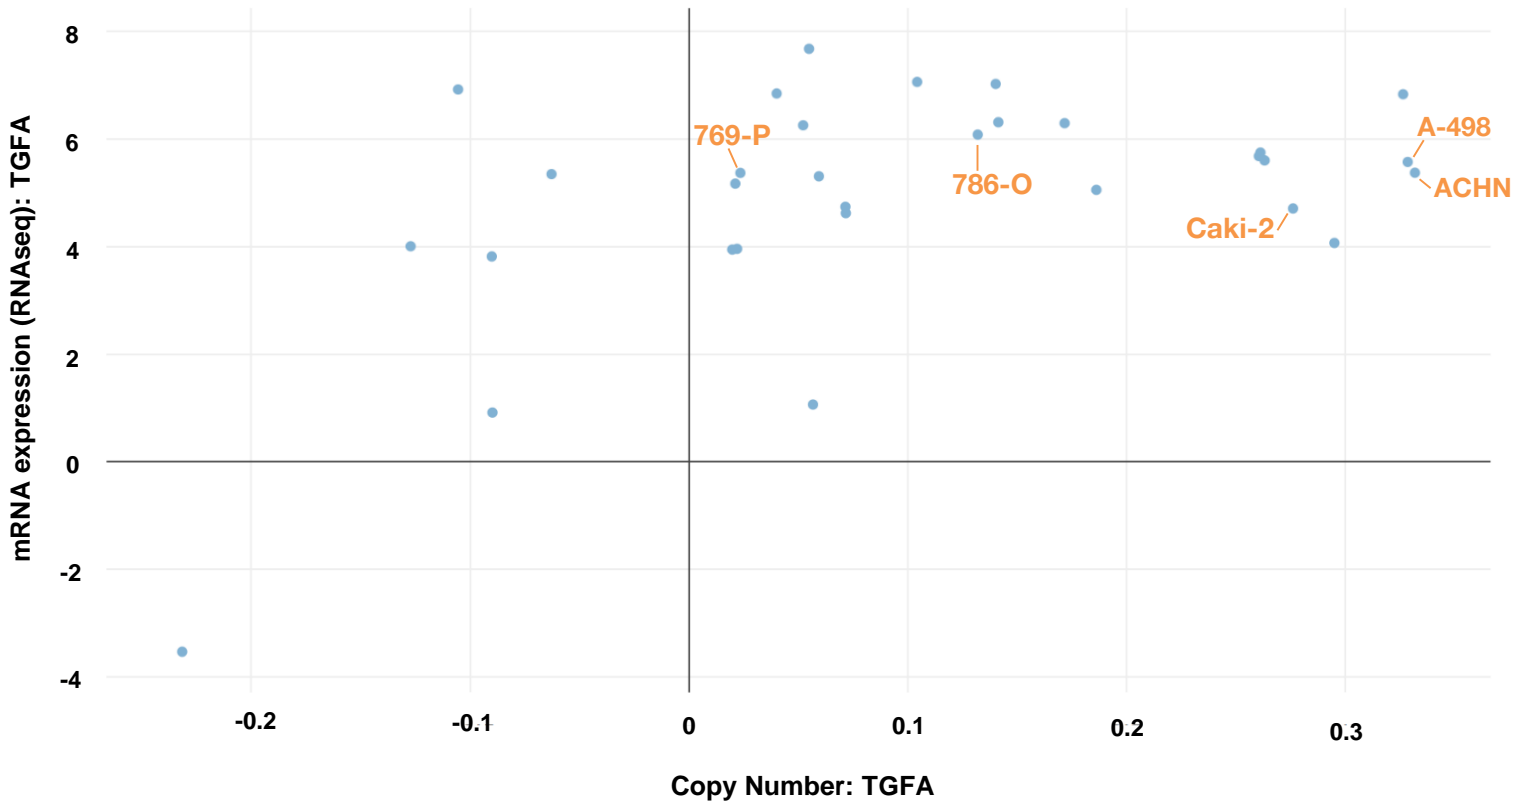

Supplement: MOESM4 [file 19574190]
