# Supplementary material for: Altered proTGFα/cleaved TGFα ratios offer new therapeutic strategies in renal carcinoma
Source: Springer Nature journal article supplement (doi:10.1186/s13046-021-02051-0), 2021-08-16
Supplement: MOESM5 [file 19574190]

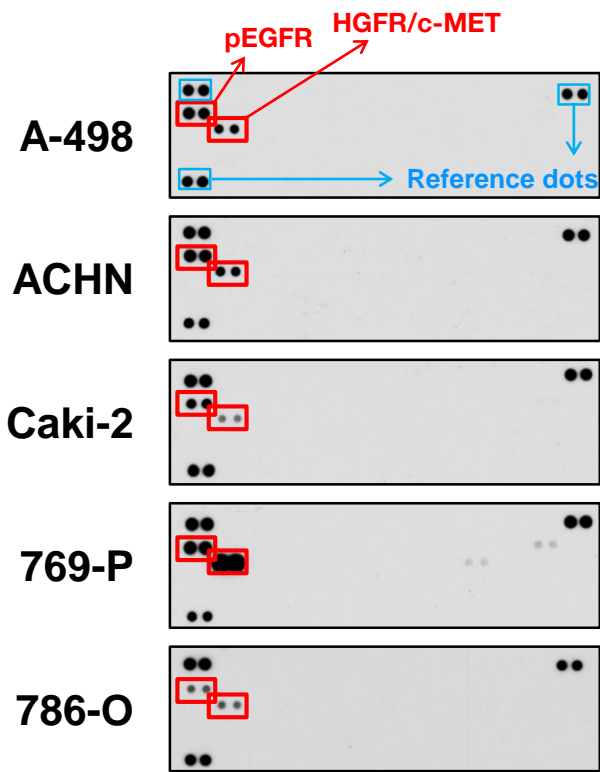

Supplementary figure 5
